# Supplementary material
Source: HighWire-hosted journal article supplement (https://bmjopen.bmj.com/content/11/12/e057489)
Supplement: inline-supplementary-material-2 [file inline-supplementary-material-2.pdf]

**Table 2 Search strategy for all databases****Research performed in PubMed database (August 24, 2021)**

| Search | Query                                                                                                                                                                                                                                                                                                                                        | Records retrieved |
|--------|----------------------------------------------------------------------------------------------------------------------------------------------------------------------------------------------------------------------------------------------------------------------------------------------------------------------------------------------|-------------------|
| #1     | "pediatric intensive care unit*" [Title/Abstract] OR "paediatric intensive care unit*" [Title/Abstract] OR "PICU" [Title/Abstract] OR "intensive care units, pediatric" [MeSH Terms]                                                                                                                                                         | 29,476            |
| #2     | "family" [Title/Abstract] OR "families" [Title/Abstract] OR "family" [MeSH Terms] OR "parents" [MeSH Terms] OR "parent*" [Title/Abstract] OR "father" [Title/Abstract] OR "mother" [Title/Abstract]                                                                                                                                          | 1,629,920         |
| #3     | "end of life care" [Title/Abstract] OR "Palliative Care" [Title/Abstract] OR "Terminal Care" [Title/Abstract] OR "grief care" [Title/Abstract] OR "bereavement care" [Title/Abstract] OR "Terminal Care" [MeSH Terms] OR "Palliative Care" [MeSH Terms]                                                                                      | 113,604           |
| #4     | "experience*" [Title/Abstract] OR "behavior*" [Title/Abstract] OR "perception" [Title/Abstract] OR "perspective" [Title/Abstract] OR "Qualitative Research" [MeSH Terms] OR "Interviews as Topic" [MeSH Terms] OR "Narration" [MeSH Terms] OR "Qualitative" [Title/Abstract] OR "interview*" [Title/Abstract] OR "narrati*" [Title/Abstract] | 2,928,889         |
| #5     | #1 AND #2 AND #3 AND #4                                                                                                                                                                                                                                                                                                                      | 170               |

**Research performed in Embase database (August 24, 2021)**

| Search | Query                                                              | Records retrieved |
|--------|--------------------------------------------------------------------|-------------------|
| #1     | pediatric intensive care unit*:ab,ti                               | 10,494            |
| #2     | paediatric intensive care unit*:ab,ti                              | 2,810             |
| #3     | picu':ab,ti                                                        | 12,278            |
| #4     | pediatric intensive care unit'/exp                                 | 8,846             |
| #5     | family':ab,ti                                                      | 1,073,515         |
| #6     | families':ab,ti                                                    | 322,030           |
| #7     | family'/exp                                                        | 553,146           |
| #8     | parent'/exp                                                        | 259,337           |
| #9     | parent*':ab,ti                                                     | 564,786           |
| #10    | mother':ab,ti                                                      | 172,128           |
| #11    | father':ab,ti                                                      | 40,047            |
| #12    | #1 OR #2 OR #3 OR #4                                               | 22,163            |
| #13    | #5 OR #6 OR #7 OR #8 OR #9 OR #10 OR #11                           | 2,073,185         |
| #14    | experience*':ab,ti                                                 | 1,667,857         |
| #15    | behavior*':ab,ti                                                   | 1,194,768         |
| #16    | perception':ab,ti                                                  | 225,143           |
| #17    | perspective':ab,ti                                                 | 290,023           |
| #18    | qualitative':ab,ti                                                 | 320,976           |
| #19    | interview*':ab,ti                                                  | 496,584           |
| #20    | narrati*':ab,ti                                                    | 60,078            |
| #21    | qualitative research'/exp                                          | 91,511            |
| #22    | interview'/exp                                                     | 313,621           |
| #23    | verbal communication'/exp                                          | 346,852           |
| #24    | #14 OR #15 OR #16 OR #17 OR #18 OR #19 OR #20 OR #21 OR #22 OR #23 | 3,971,439         |
| #25    | end of life care':ab,ti                                            | 15,150            |
| #26    | palliative care':ab,ti                                             | 49,931            |
| #27    | terminal care':ab,ti                                               | 1,903             |
| #28    | grief care':ab,ti                                                  | 35                |
| #29    | bereavement care':ab,ti                                            | 544               |
| #30    | terminal care'/exp                                                 | 75,020            |
| #31    | palliative therapy'/exp                                            | 122,066           |
| #32    | #25 OR #26 OR #27 OR #28 OR #29 OR #30 OR #31                      | 183,527           |
| #33    | #12 AND #13 AND #24 AND #32                                        | 163               |

**Research performed in CINAHL database (August 24, 2021)**

| Search | Query                                                                                                           | Records retrieved |
|--------|-----------------------------------------------------------------------------------------------------------------|-------------------|
| #1     | TI "pediatric intensive care unit*" AND AB "pediatric intensive care unit"                                      | 693               |
| #2     | TI "paediatric intensive care unit*" AND AB "paediatric intensive care unit"                                    | 162               |
| #3     | TI "PICU" AND AB "PICU"                                                                                         | 331               |
| #4     | (MH "Intensive Care Units, Pediatric") OR (MH "Intensive Care Units") OR (MH "Pediatric Units")                 | 49,618            |
| #5     | #1 OR #2 OR #3 OR #4                                                                                            | 49,734            |
| #6     | TI "family" AND AB "family"                                                                                     | 31,669            |
| #7     | TI "families" AND AB "families"                                                                                 | 9,020             |
| #8     | (MH "Family")                                                                                                   | 44,454            |
| #9     | (MH "Parents") OR (MH "Parental Attitudes")                                                                     | 57,795            |
| #10    | TI "parent*" AND AB "parent"                                                                                    | 36,171            |
| #11    | TI "father" AND AB "father"                                                                                     | 749               |
| #12    | TI "mother" AND AB "mother"                                                                                     | 3,233             |
| #13    | #6 OR #7 OR #8 OR #9 OR #10 OR #11 OR #12                                                                       | 146,337           |
| #14    | TI "end of life care" AND AB "end of life care"                                                                 | 1,914             |
| #15    | TI "Palliative Care" AND AB "Palliative Care"                                                                   | 9,401             |
| #16    | TI "Terminal Care" AND AB "Terminal Care"                                                                       | 68                |
| #17    | TI "grief care" AND AB "grief care"                                                                             | 2                 |
| #18    | TI "bereavement care" AND AB "bereavement care"                                                                 | 95                |
| #19    | (MH "Terminal Care") OR (MH "Terminally Ill Patients")                                                          | 28,453            |
| #20    | (MH "Palliative Care") OR (MH "Palliative Medicine")                                                            | 38,488            |
| #21    | #14 OR #15 OR #16 OR #17 OR #18 OR #19 OR #20                                                                   | 60,441            |
| #22    | TI "experience*" AND AB "experience"                                                                            | 50,944            |
| #23    | TI "behavior*" AND AB "behavior"                                                                                | 44,675            |
| #24    | TI "perception" AND AB "perception"                                                                             | 7,713             |
| #25    | TI "perspective" AND AB "perspective"                                                                           | 5,559             |
| #26    | (MH "Qualitative Studies")                                                                                      | 124,124           |
| #27    | (MH "Semi-Structured Interview") OR (MH "Interview Guides") OR (MH "Interviews") OR (MH "Structured Interview") | 244,414           |
| #28    | (MH "Narratives") OR (MH "Narrative Medicine") OR (MH "Life Histories")                                         | 20,067            |
| #29    | TI "Qualitative" AND AB "Qualitative"                                                                           | 19,614            |
| #30    | TI "interview*" AND AB "interview"                                                                              | 7,334             |
| #31    | TI "narrati*" AND AB "narrati"                                                                                  | 5,720             |
| #32    | #22 OR #23 OR #24 OR #25 OR #26 OR #27 OR #28 OR #29 OR #30 OR #31                                              | 389,355           |
| #33    | #5 AND #13 AND #21 AND #32                                                                                      | 112               |

**Research performed in PsycINFO database (August 24, 2021)**

| Search | Query                                                                                                           | Records retrieved |
|--------|-----------------------------------------------------------------------------------------------------------------|-------------------|
| #1     | TI "pediatric intensive care unit*" AND AB "pediatric intensive care unit*"                                     | 693               |
| #2     | TI "paediatric intensive care unit*" AND AB "paediatric intensive care unit*"                                   | 162               |
| #3     | TI "PICU" AND AB "PICU"                                                                                         | 331               |
| #4     | (MH "Intensive Care Units, Pediatric") OR (MH "Intensive Care Units") OR (MH "Pediatric Units")                 | 49,618            |
| #5     | #1 OR #2 OR #3 OR #4                                                                                            | 49,734            |
| #6     | TI "family" AND AB "family"                                                                                     | 31,669            |
| #7     | TI "families" AND AB "families"                                                                                 | 9,020             |
| #8     | (MH "Family")                                                                                                   | 44,454            |
| #9     | (MH "Parents") OR (MH "Parental Attitudes")                                                                     | 57,795            |
| #10    | TI "parent*" AND AB "parent*"                                                                                   | 36,171            |
| #11    | TI "father" AND AB "father"                                                                                     | 749               |
| #12    | TI "mother" AND AB "mother"                                                                                     | 3,233             |
| #13    | #6 OR #7 OR #8 OR #9 OR #10 OR #11 OR #12                                                                       | 146,337           |
| #14    | TI "end of life care" AND AB "end of life care"                                                                 | 1,914             |
| #15    | TI "Palliative Care" AND AB "Palliative Care"                                                                   | 9,401             |
| #16    | TI "Terminal Care" AND AB "Terminal Care"                                                                       | 68                |
| #17    | TI "grief care" AND AB "grief care"                                                                             | 2                 |
| #18    | TI "bereavement care" AND AB "bereavement care"                                                                 | 95                |
| #19    | (MH "Terminal Care") OR (MH "Terminally Ill Patients")                                                          | 28,453            |
| #20    | (MH "Palliative Care") OR (MH "Palliative Medicine")                                                            | 38,488            |
| #21    | #14 OR #15 OR #16 OR #17 OR #18 OR #19 OR #20                                                                   | 60,441            |
| #22    | TI "experience*" AND AB "experience*"                                                                           | 50,944            |
| #23    | TI "behavior*" AND AB "behavior*"                                                                               | 44,675            |
| #24    | TI "perception" AND AB "perception"                                                                             | 7,713             |
| #25    | TI "perspective" AND AB "perspective"                                                                           | 5,559             |
| #26    | (MH "Qualitative Studies")                                                                                      | 124,124           |
| #27    | (MH "Semi-Structured Interview") OR (MH "Interview Guides") OR (MH "Interviews") OR (MH "Structured Interview") | 244,414           |
| #28    | (MH "Narratives") OR (MH "Narrative Medicine") OR (MH "Life Histories")                                         | 20,067            |
| #29    | TI "Qualitative" AND AB "Qualitative"                                                                           | 19,614            |
| #30    | TI "interview*" AND AB "interview*"                                                                             | 7,334             |
| #31    | TI "narrati*" AND AB "narrati*"                                                                                 | 5,720             |
| #32    | #22 OR #23 OR #24 OR #25 OR #26 OR #27 OR #28 OR #29 OR #30 OR #31                                              | 389,355           |
| #33    | #5 AND #13 AND #21 AND #32                                                                                      | 112               |
