# Supplementary material
Source: HighWire-hosted journal article supplement (https://bmjopen.bmj.com/content/11/12/e057489)
Supplement: inline-supplementary-material-3 [file inline-supplementary-material-3.pdf]

## Supplemental III

Table 3 Detailed characteristics of included studies

| Authors (year), Location              | Qualitative study aims                                                                                                                                                                                                | Setting        | Participants                                                                                                                                                                                              | Characteristics of the children                                                                                                                                                                                                                                                                                                                                                                                                                         | Research methodology/ qualitative data collection method/ qualitative data analysis method |
|---------------------------------------|-----------------------------------------------------------------------------------------------------------------------------------------------------------------------------------------------------------------------|----------------|-----------------------------------------------------------------------------------------------------------------------------------------------------------------------------------------------------------|---------------------------------------------------------------------------------------------------------------------------------------------------------------------------------------------------------------------------------------------------------------------------------------------------------------------------------------------------------------------------------------------------------------------------------------------------------|--------------------------------------------------------------------------------------------|
| Mitchell, (2019), United Kingdom [18] | To provide in-depth insight into the experience and perceptions of bereaved parents who have experienced end-of-life care decision-making for children with life-limiting or life-threatening conditions in the PICU. | PICU (31 beds) | 17 bereaved parents of 11 deceased children (5 single mothers and 6 coupled parents)<br>The mean time between bereavement and interview was 11.8 months, median 10 months, and the shortest was 7 months. | < Age at death (N = 11) ><br><ul style="list-style-type: none"> <li>• 5 months (n = 2)</li> <li>• 6 months (n = 1)</li> <li>• 9 months (n = 1)</li> <li>• 1 year 11 months (n = 1)</li> <li>• 2 years (n = 1)</li> <li>• 2 years 11 months (n = 1)</li> <li>• 3 years (n = 1)</li> <li>• 11 years (n = 1)</li> <li>• 16 years (n = 1)</li> <li>• 18 years (n = 1)</li> </ul> < Type of death ><br>Children with a pre-existing life-limiting condition. | In-depth qualitative interview study/<br>semi-structured interview/<br>thematic analysis   |

|                           |                                                                                                                                                                       |        |                                                                                                                                                                      |                                                                                                                                                                                                                                                                                                                                                                                                                                                                                                                                |                                                                                                                         |
|---------------------------|-----------------------------------------------------------------------------------------------------------------------------------------------------------------------|--------|----------------------------------------------------------------------------------------------------------------------------------------------------------------------|--------------------------------------------------------------------------------------------------------------------------------------------------------------------------------------------------------------------------------------------------------------------------------------------------------------------------------------------------------------------------------------------------------------------------------------------------------------------------------------------------------------------------------|-------------------------------------------------------------------------------------------------------------------------|
| Liu , (2014), Taiwan [23] | To explore the parental experience of making a “do not resuscitate” (DNR) decision for their child who is or was cared for in a PICU in Taiwan.                       | PICU   | 16 bereaved parents (9 mothers and 7 fathers)<br>All of the participants were approached to sign the DNR form by a physician who was involved in their child’s care. | N =11<br>Parents of children who were admitted for presumed or confirmed abuse, neglect, or accidental trauma were excluded.<br>At the time of the interview, 6 children were living and 5 were deceased.                                                                                                                                                                                                                                                                                                                      | Qualitative study/<br>non-specified (interviews were held at the parent’s selected place)/<br>thematic content analysis |
| Abib, (2013), Brazil [28] | To evaluate the quality of care offered to terminally ill children and their families in the last days of life in two Brazilian PICUs from the parents’ perspectives. | 2PICUs | 15 bereaved parents of 9 deceased children                                                                                                                           | N = 10<br><Age at death/ PICU length of stay (days)/<br>Main diagnosis(n) ><br>• 2 months/13 days/ septic shock/ renal failure/ hepatic failure (n = 1)<br>• 5 months/9 days/acute viral bronchiolitis(AVB)/ cardiogenic shock/congenital heart disease/Down’s syndrome/sepsis (n = 1)<br>• 8 months/4 days/AVB/septic shock (n = 1)<br>• 11 months/5 days/acute respiratory distress(ARDS) (n = 1)<br>• 13 months/11 days/ AVB/ septic shock/ ARDS/ renal failure (n = 1)<br>• 14 months/4 days/AVB/septic shock/ARDS (n = 1) | Qualitative exploratory<br>descriptive study/<br>semi-structured interview/<br>thematic content analysis                |

|                             |                                                                          |               |                                   |                                                                                                                                                                                                                                                                                                                                                                                                                                                                                                                                                                                               |                                                                                          |
|-----------------------------|--------------------------------------------------------------------------|---------------|-----------------------------------|-----------------------------------------------------------------------------------------------------------------------------------------------------------------------------------------------------------------------------------------------------------------------------------------------------------------------------------------------------------------------------------------------------------------------------------------------------------------------------------------------------------------------------------------------------------------------------------------------|------------------------------------------------------------------------------------------|
|                             |                                                                          |               |                                   | <ul style="list-style-type: none"> <li>• 27 months/8 days/AVB/septic shock/ARDS/renal failure (n = 1)</li> <li>• 48 months/32 days/Septic shock/ARDS/parainfluenza pneumonia /neuroblastoma (n = 1)</li> <li>• 60 months/16 days/ Short bowel syndrome/septic shock (n = 1)</li> <li>• 120 months/ 20 days/ AVB/septic shock/ARDS/renal failure/hyponatraemia (n = 1)</li> </ul> <p>&lt;Cardiopulmonary resuscitation&gt;</p> <ul style="list-style-type: none"> <li>• Yes (n = 6)</li> <li>• No (n = 4)</li> </ul>                                                                           |                                                                                          |
| Lamiani, (2013), Italy [19] | To explore parents' experience with end-of-life care in a PICU in Italy. | PICU (6 beds) | 12 parents of 8 deceased children | <p>&lt;Age at death (N = 8)&gt;</p> <ul style="list-style-type: none"> <li>• 2 months (n = 2)</li> <li>• 8 months (n = 1)</li> <li>• 9 months (n = 1)</li> <li>• 2 years (n = 1)</li> <li>• 3 years (n = 1)</li> <li>• 8 years (n = 1)</li> <li>• 13 years (n = 1)</li> </ul> <p>&lt;Type of admission (N = 8)&gt;</p> <ul style="list-style-type: none"> <li>•Emergency (n = 7)</li> <li>•Planned (n = 1)</li> </ul> <p>&lt;Length of the last PICU stay (N = 8)&gt;</p> <ul style="list-style-type: none"> <li>•4 days (n = 1)</li> <li>•8 days (n = 1)</li> <li>•9 days (n = 2)</li> </ul> | Hermeneutic-phenomenology approach/ semi-structured interview/ phenomenological analysis |

|                                    |                                                                                                                                   |         |                                  |                                                                                                                                                                                                                                                                                                                                                                                                                                                                                                                                                                                                                                              |                                                                                                                                                           |
|------------------------------------|-----------------------------------------------------------------------------------------------------------------------------------|---------|----------------------------------|----------------------------------------------------------------------------------------------------------------------------------------------------------------------------------------------------------------------------------------------------------------------------------------------------------------------------------------------------------------------------------------------------------------------------------------------------------------------------------------------------------------------------------------------------------------------------------------------------------------------------------------------|-----------------------------------------------------------------------------------------------------------------------------------------------------------|
|                                    |                                                                                                                                   |         |                                  | <ul style="list-style-type: none"> <li>•10 days (n = 1)</li> <li>•11 days (n = 1)</li> <li>•31 days (n = 1)</li> <li>•44 days (n = 1)</li> </ul> <p>&lt;Type of death (N = 8) &gt;</p> <ul style="list-style-type: none"> <li>•Withdrawing of life support (n = 3)</li> <li>•Withholding of life support (n = 1)</li> <li>•Withholding and withdrawing of life support (n = 2)</li> <li>•Failed CPR (n = 2)</li> </ul>                                                                                                                                                                                                                       |                                                                                                                                                           |
| McGraw, (2012), United States [24] | To explore how parents of children dying in the PICU understood their role and discuss implications for clinical care and policy. | 2 PICUs | 18 bereaved parents (17 mothers) | <p>N = 18</p> <p>&lt;Age at death / Range (n)&gt;</p> <ul style="list-style-type: none"> <li>• Infant / .3–7 (n = 6)</li> <li>• Toddler•Child / 1.5–4 (n = 3)</li> <li>• Pre-teen•adolescent / 10–12 (n = 2)</li> <li>• Adult / 19–37 (n = 7)</li> </ul> <p>&lt;Type of condition (n)&gt;</p> <ul style="list-style-type: none"> <li>• Acute (n = 3)</li> <li>• Chronic (n = 15)</li> </ul> <p>&lt;Diagnosis (n)&gt;</p> <ul style="list-style-type: none"> <li>• Leukemia (n = 5)</li> <li>• Other cancer (n = 4)</li> <li>• Other (n = 4)</li> <li>• Congenital diaphragmatic hernia (n = 3)</li> <li>• Cystic fibrosis (n = 1)</li> </ul> | Qualitative study/ semi-structured telephone interviews/ analytically, a series of iterative steps were employed using Atlas.ti to facilitate the coding. |

|                                    |                                                                                                                                                                                                       |               |                                                           |                                                                                                                                                                                                                                                                                                  |                                                                                                                 |
|------------------------------------|-------------------------------------------------------------------------------------------------------------------------------------------------------------------------------------------------------|---------------|-----------------------------------------------------------|--------------------------------------------------------------------------------------------------------------------------------------------------------------------------------------------------------------------------------------------------------------------------------------------------|-----------------------------------------------------------------------------------------------------------------|
|                                    |                                                                                                                                                                                                       |               |                                                           | <ul style="list-style-type: none"> <li>• Trauma/burns (n = 1)</li> </ul> <Length of stay in PICU (n)> <ul style="list-style-type: none"> <li>• 0–7 days (n = 5)</li> <li>• 8–14 days (n = 5)</li> <li>• 15–21 days (n = 2)</li> <li>• 22–28 days (n = 3)</li> <li>• 29 days + (n = 3)</li> </ul> |                                                                                                                 |
| Gordon, (2009), United States [25] | To present parents' descriptions and narratives of communicative experiences they had with PICU clinicians, focusing on how parents use accounts to evaluate the communicative behaviors they report. | Not specified | Bereaved parents (N = 51)                                 | Not specified                                                                                                                                                                                                                                                                                    | Semi-structured audio-recorded telephone interview/<br>discourse analysis                                       |
| Butler, (2018), Australia [21]     | To explore bereaved parents' judgements of healthcare providers in the PICU, as part of a                                                                                                             | 4 PICUs       | 26 bereaved parents (10 individual mothers and 8 couples) | < Age at death (N = 18) > <ul style="list-style-type: none"> <li>• Infant; &lt; 1 year (n = 9)</li> <li>• Toddler; 1–5 years (n = 4)</li> <li>• Teenager; 13 years (n = 5)</li> </ul> <Illness type (N = 18)>                                                                                    | Constructivist grounded theory study/<br>semi-structured interviews (in the parents' home environment or phone) |

|                                                                         |                                                                                                                                                                                    |               |                                                         |                                                                                                                                                                                                                                                        |                                                                                                                                     |
|-------------------------------------------------------------------------|------------------------------------------------------------------------------------------------------------------------------------------------------------------------------------|---------------|---------------------------------------------------------|--------------------------------------------------------------------------------------------------------------------------------------------------------------------------------------------------------------------------------------------------------|-------------------------------------------------------------------------------------------------------------------------------------|
|                                                                         | larger study which aimed to explore their interactions with HCPs when their child died in the PICU.                                                                                |               | Range of time since death: 7 months to 3 years 8 months | <ul style="list-style-type: none"> <li>• Chronic (n = 7)</li> <li>• Acute (n = 11)</li> </ul> <Type of death (N = 18) > <ul style="list-style-type: none"> <li>• Withdrawal (n = 17)</li> <li>• CPR (n = 1)</li> <li>• Unsuccessful (n = 1)</li> </ul> | interviews)/ the constant comparative analysis method was used to analyze the data, alongside open, focused and theoretical coding. |
| Butler, (2018), (secondary analysis of 2018 [21] study), Australia [27] | To explore bereaved parents' perspectives of parent and staff roles in the PICU when their child was dying, as well as their relationships with healthcare staff during this time. | Same as above | Same as above                                           | Same as above                                                                                                                                                                                                                                          | Same as above                                                                                                                       |
| Butler, (2019) (tertiary analysis of 2018a study), Australia [26]       | To describe bereaved parents' recommendations for improvements in end-of-life care and bereavement follow-up when a child dies in intensive care.                                  | Same as above | Same as above                                           | Same as above                                                                                                                                                                                                                                          | Same as above                                                                                                                       |

|                                                                    |                                                                                                                    |                |                                                                 |                                                                                                                                                                                                                                                                                                                                                                                                                                                                                                                                                                                                                                                                                                                                                                                                                                                                                               |                                                                                           |
|--------------------------------------------------------------------|--------------------------------------------------------------------------------------------------------------------|----------------|-----------------------------------------------------------------|-----------------------------------------------------------------------------------------------------------------------------------------------------------------------------------------------------------------------------------------------------------------------------------------------------------------------------------------------------------------------------------------------------------------------------------------------------------------------------------------------------------------------------------------------------------------------------------------------------------------------------------------------------------------------------------------------------------------------------------------------------------------------------------------------------------------------------------------------------------------------------------------------|-------------------------------------------------------------------------------------------|
| Falkenburg, (2016), Netherlands [31]                               | To explore in what sense physical aspects influence the parent-child relationship in end-of-life care in the PICU. | PICU (34 beds) | 16 couples and 3 mothers and 1 father individually participated | <p>&lt; Age at death (N = 20) &gt;</p> <ul style="list-style-type: none"> <li>• Newborns (n = 2)</li> <li>• 1 month to 1 year (n = 11)</li> <li>• &gt; 1 to 6 years (n = 3)</li> <li>• &gt; 6 to 14 years (n = 4)</li> </ul> <p>&lt;Diagnosis (N = 20)&gt;</p> <ul style="list-style-type: none"> <li>• Complex cardiac anomaly (n = 8)</li> <li>• Respiratory insufficiency (n = 3)</li> <li>• Congenital diaphragmatic hernia (n = 2)</li> <li>• Trauma (n = 2)</li> <li>• Neuromuscular disease (n = 2)</li> <li>• Metabolic disorder (n = 1)</li> <li>• Arteriovenous malformation (n = 1)</li> <li>• Oncologic (n = 1)</li> </ul> <p>&lt;Extracorporeal membrane oxygenation treatment&gt;</p> <ul style="list-style-type: none"> <li>• n = 5 (25.0%)</li> </ul> <p>&lt; Length of stay ICU last admission &gt;</p> <ul style="list-style-type: none"> <li>• 12 days (median)</li> </ul> | Qualitative study/<br>unstructured in-depth interviews/<br>coding and selection of themes |
| Falkenburg, (2018) (secondary analysis of 2016 study), Netherlands | To learn what interactions of grieving parents with medical and nursing staff remain meaningful in the             | Same as above  | Same as above                                                   | Same as above                                                                                                                                                                                                                                                                                                                                                                                                                                                                                                                                                                                                                                                                                                                                                                                                                                                                                 | Same as above                                                                             |

|                                                                        |                                                                                                                                                               |                                    |                                         |                                                                                                                                                                                                                                                                                                    |                                                                                                                                  |
|------------------------------------------------------------------------|---------------------------------------------------------------------------------------------------------------------------------------------------------------|------------------------------------|-----------------------------------------|----------------------------------------------------------------------------------------------------------------------------------------------------------------------------------------------------------------------------------------------------------------------------------------------------|----------------------------------------------------------------------------------------------------------------------------------|
| [20]                                                                   | long term when facing the existential distress of their child's death in the PICU.                                                                            |                                    |                                         |                                                                                                                                                                                                                                                                                                    |                                                                                                                                  |
| Falkenburg, (2020) (tertiary analysis of 2016 study), Netherlands [22] | To learn more from the stories of bereaved parents about the specific features and function of the spirituality that is part of the confrontation with death. | Same as above                      | Same as above                           | The children's age at the time of death varied from 2 weeks to 14 years. Length of stay in the PICU varied from 2 hours to over 5 months. Four children had been hospitalized from birth until death.                                                                                              | Qualitative study/<br>unstructured face-to-face interviews (in the parents' home environment)/<br>coding and selection of themes |
| Michelson, (2011), United States [30]                                  | To examine clinicians' and parents' reflections on PICU family conferences (FCs) in the context of discussion about end-of-life care decision making.         | PICU (A university-based hospital) | 18 bereaved parents (11 Female, 7 Male) | N = 13<br>Parents of a child $\geq$ 8 years old (younger children who rarely have the capacity to assent to treatment and participate in end-of-life decisions).<br><Age at death (years)><br>• Mean 1.9<br>• Median 0.53<br>• Range 0.06–6.5<br><Limitations of medical therapies identified (n)> | Retrospective qualitative study/<br>semi-structured one-on-one interviews/                                                       |



|                                                                          |                                                                                                                                                            |               |               |                                                                                                                                                                                                                                                                                                                                                                                                                                                                          |                                                                                                                                                                                                                           |
|--------------------------------------------------------------------------|------------------------------------------------------------------------------------------------------------------------------------------------------------|---------------|---------------|--------------------------------------------------------------------------------------------------------------------------------------------------------------------------------------------------------------------------------------------------------------------------------------------------------------------------------------------------------------------------------------------------------------------------------------------------------------------------|---------------------------------------------------------------------------------------------------------------------------------------------------------------------------------------------------------------------------|
|                                                                          |                                                                                                                                                            |               |               | <ul style="list-style-type: none"> <li>• Yes (n = 12)</li> <li>• No (n = 1)</li> </ul> <p>&lt;Cause of death (n)&gt;</p> <ul style="list-style-type: none"> <li>• Neoplasm (n = 7)</li> <li>• Heart disease (n = 3)</li> <li>• Bowel perforation (n = 1)</li> <li>• Sepsis (n = 1)</li> <li>• Trauma (n = 1)</li> </ul> <p>&lt;PICU length of stay (days)&gt;</p> <ul style="list-style-type: none"> <li>• Mean 8.7</li> <li>• Median 3</li> <li>• Range 0–38</li> </ul> |                                                                                                                                                                                                                           |
| Michelson, (2013) (secondary analysis of 2011 study), United States [29] | To describe issues important in PICU end-of-life care decision making and identify possible methods for improving the decision-making process for parents. | Same as above | Same as above | Same as above                                                                                                                                                                                                                                                                                                                                                                                                                                                            | Retrospective qualitative study/<br>one-on-one interviews/<br>open coding (labeling of data based on ideas, concepts, patterns, and properties identified) of the entire dataset. From this coding, the category emerged. |
